# Supplementary material for: Spatial and Temporal Hot Spots of Aedes albopictus Abundance inside and outside a South European Metropolitan Area
Source: PubMed Central journal article supplement (PMC4917172; doi:10.1371/journal.pntd.0004758), 2016-06-22
Supplement: pntd.0004758.s001.pdf [file pntd.0004758.s001.pdf]

| Station ID | GPS         |             | Ecology         | Population Density | % Vegetation 3 km | % Vegetation 300 m | 1           | 2           |
|------------|-------------|-------------|-----------------|--------------------|-------------------|--------------------|-------------|-------------|
|            | Latitude    | Longitude   |                 |                    |                   |                    |             |             |
| 1          | 41.83824382 | 12.2046277  | Sub-Urban/Rural | 1706.325           | 31.19             | 41.97              | 0.25 + 0.25 | 3.25 + 1.18 |
| 2          | 41.82066696 | 12.23801976 | Sub-Urban/Rural | 11.368             | 34.25             | 45.99              | 2.75 + 1.89 | 3.25 + 0.25 |
| 3          | 41.8042066  | 12.2230366  | Sub-Urban/Rural | 2696.952           | 28.65             | 33.39              | 2 + 1.68    | 6.33 + 1.2  |
| 4          | 41.7763722  | 12.22691256 | Sub-Urban/Rural | 4959.511           | 29.4              | 38.94              | 8.33 + 5.04 | 5.75 + 1.75 |
| 5          | 41.80934886 | 12.31985942 | Sub-Urban/Rural | 20.459             | 51.83             | 37.56              | 7.75 + 1.89 | 9 + 1.68    |
| 6          | 41.8174563  | 12.34435483 | Sub-Urban/Rural | 1820.085           | 61.54             | 44.58              | 3 + 0.58    | 1.75 + 0.48 |
| 7          | 41.82486978 | 12.40949916 | Sub-Urban/Rural | 21.425             | 65.58             | 56.86              | 2.67 + 2.19 | 2.5 + 2.18  |
| 8          | 41.84758002 | 12.45450048 | Metropolitan    | 9298.187           | 57.15             | 50.6               | 5 + 4.67    | 6.67 + 4.26 |
| 9          | 41.87240106 | 12.465888   | Metropolitan    | 18263.52           | 53.21             | 35.46              | 1.75 + 0.85 | 1.25 + 0.75 |
| 10         | 41.90178235 | 12.42769521 | Metropolitan    | 16844.138          | 60.12             | 28.73              | 3.33 + 0.33 | 6.75 + 2.56 |
| 11         | 41.90746141 | 12.44775396 | Metropolitan    | 23260.09           | 54.6              | 30.42              | 1.25 + 0.63 | 2 + 0.71    |
| 12         | 41.91353299 | 12.47583383 | Metropolitan    | 3117.546           | 47.45             | 55.91              | 2.25 + 1.31 | 2 + 1.41    |
| 13         | 41.89463452 | 12.50397023 | Metropolitan    | 26655.809          | 39.48             | 28.52              | 4 + 3       | 2.25 + 0.85 |
| 14         | 41.86761525 | 12.53541125 | Metropolitan    | 10817.479          | 62.13             | 46.98              | 5.25 + 2.87 | 3 + 1.15    |
| 15         | 41.93417412 | 12.52382362 | Metropolitan    | 12483.623          | 59.11             | 51.03              | NA          | 10.5 + 2.6  |
| 16         | 42.06513769 | 12.59593012 | Sub-Urban/Rural | 5786.351           | 61.81             | 36.38              | NA          | 7           |
| 17         | 42.10367001 | 12.63226228 | Sub-Urban/Rural | 32.283             | 67.85             | 64.46              | NA          | 3.75 + 1.25 |
| 18         | 42.15555727 | 12.6482546  | Sub-Urban/Rural | 2372.94            | 62.65             | 47.15              | NA          | 3.5 + 0.96  |
| 19         | 42.24127405 | 12.63323956 | Sub-Urban/Rural | 833.476            | 72.73             | 67.75              | NA          | 1 + 0.58    |
| 20         | 42.22748119 | 12.6844347  | Sub-Urban/Rural | 285.649            | 75.04             | 68.46              | NA          | NA          |
| 21         | 42.25766386 | 12.74593705 | Sub-Urban/Rural | 562.593            | 82.71             | 65.73              | NA          | 0.33 + 0.33 |

Table S1 – Weekly mean of *Aedes albopictus* adult females ( $\pm$ SE) in each of the 21 sampling station over 18-week sampling along a 70km-trai

| Weeks       |             |              |              |               |               |              |              |
|-------------|-------------|--------------|--------------|---------------|---------------|--------------|--------------|
| 3           | 4           | 5            | 6            | 7             | 8             | 9            | 10           |
| 3 + 1.53    | 2.5 + 1.5   | 6.25 + 2.95  | 10.5 + 3.88  | 8 + 3.72      | 8.75 + 3.12   | 8 + 2.38     | 7 + 4.02     |
| 8.5 + 2.25  | 6.25 + 1.65 | 13.75 + 7.7  | 10.75 + 4.8  | 5.25 + 1.65   | 9 + 3.24      | 6.5 + 2.9    | 1 + 0.41     |
| 4 + 1.58    | 3.67 + 2.19 | 2.5 + 0.87   | 7 + 2.68     | 3.25 + 0.48   | 2.75 + 0.95   | 2.75 + 0.63  | 0.75 + 0.25  |
| 5 + 1.47    | 4 + 1.63    | 6.75 + 3.09  | 9.25 + 1.49  | 15 + 3.54     | 16 + 3.89     | 13.75 + 3.52 | 9.5 + 2.25   |
| 4.5 + 1.44  | 4.75 + 2.32 | 14.75 + 6.76 | 20.5 + 7.9   | 35.5 + 8.72   | 17 + 7.84     | 12.25 + 2.29 | NA           |
| 3 + 0.71    | 4 + 2.27    | 8.75 + 3.12  | 6.75 + 1.8   | 7.5 + 1.26    | 6 + 4         | 5.75 + 1.25  | 11           |
| 4 + 3.67    | 4.25 + 2.1  | 6.5 + 3.1    | 1.75 + 0.48  | 5.75 + 2.46   | 2 + 0.91      | 1.75 + 1.75  | NA           |
| 4 + 1.15    | 4.5 + 2.9   | 6.5 + 2.9    | 5.75 + 2.56  | 4.75 + 1.65   | 10.25 + 4.99  | 5.5 + 4.5    | NA           |
| 3.33 + 1.2  | 1 + 0.58    | 5.75 + 2.53  | 5 + 1        | 6.5 + 0.29    | 9.25 + 1.89   | 4.33 + 0.88  | NA           |
| 5 + 1.96    | 5.75 + 2.1  | 5.75 + 2.46  | 4 + 1.91     | 7 + 1.87      | 12.75 + 3.64  | 7 + 2.97     | 6.75 + 1.49  |
| 3.5 + 0.96  | 3 + 1.08    | 7.33 + 1.2   | 1 + 0.41     | 11 + 3.34     | 10.25 + 3.09  | 9.25 + 2.14  | 6.25 + 2.02  |
| 0.75 + 0.75 | 1 + 0.58    | 2.67 + 1.76  | 3.25 + 2.29  | 3 + 1.15      | 3.5 + 1.26    | 1.75 + 1.44  | 2.75 + 1.8   |
| 3 + 2.04    | 10.5 + 5.33 | 16.25 + 6.06 | 11 + 3.14    | 29.75 + 13.55 | 40 + 15.58    | 13.5 + 5.2   | 19.25 + 7.91 |
| 0.75 + 0.48 | 1.75 + 1.11 | 3.75 + 0.85  | 5.25 + 2.66  | 10.5 + 3.01   | 7.75 + 2.78   | 6.75 + 2.69  | 9.5 + 3.84   |
| 13 + 4.93   | 11.33 + 9.4 | 10 + 3.63    | 25.75 + 3.57 | 20 + 3.19     | 43.75 + 22.61 | 41.5 + 16.82 | 10.75 + 1.03 |
| 8.5 + 4.63  | 8.33 + 6.89 | 10.5 + 10.5  | 3 + 0.58     | 10 + 4.51     | 22 + 14       | 16.5 + 6.22  | 5 + 1.53     |
| 3.5 + 0.96  | 3.25 + 1.49 | 5.75 + 1.11  | 5 + 1        | 4.75 + 1.18   | 6.5 + 2.47    | 3.5 + 1.55   | 2.67 + 0.33  |
| 4.67 + 2.6  | 3.33 + 1.45 | 4.25 + 1.97  | 5 + 2.68     | 5.5 + 1.55    | 5.5 + 2.22    | 3.25 + 0.25  | 3.67 + 0.33  |
| 3.25 + 1.97 | 2.25 + 1.31 | 2 + 1        | 4.5 + 2.84   | 7 + 4.42      | 5.25 + 3.64   | 6 + 2.35     | 4.33 + 2.33  |
| 2.25 + 0.48 | 3 + 0.71    | 1.5 + 0.29   | 10.5 + 3.66  | 4.5 + 2.53    | 5.25 + 1.25   | 7.25 + 1.65  | 5.25 + 2.29  |
| 1.33 + 0.33 | 1 + 0.41    | 0.25 + 0.25  | 2.75 + 0.85  | 5 + 1.08      | 9.25 + 4.27   | 8.25 + 1.11  | 5 + 1        |

nsect encompassing Rome metropolitan area. Each sampling station is characterized by population density (i.e. inhabitants/km<sup>2</sup>) and vegetation cover (i.e.

| 11           | 12            | 13           | 14            | 15           | 16          | 17           | 18          |
|--------------|---------------|--------------|---------------|--------------|-------------|--------------|-------------|
| 3.5 + 1.76   | 6.5 + 2.06    | 13.5 + 6.38  | 6.25 + 1.8    | 10 + 4.71    | 2.5 + 0.96  | 3.5 + 2.25   | 0.75 + 0.48 |
| 0.5 + 0.29   | 2.75 + 1.49   | 1 + 0.71     | 2 + 0.41      | 3 + 1.53     | 1 + 0.71    | 0.25 + 0.25  | 0           |
| 3.25 + 1.6   | 5.25 + 2.59   | 15.25 + 4.66 | 3.5 + 1.66    | 3.75 + 1.03  | 6.25 + 1.31 | 2 + 0.71     | 1 + 0.41    |
| 11.5 + 4.73  | 16.75 + 10.53 | 24.75 + 9.2  | 11.25 + 2.5   | 17.75 + 3.68 | 7 + 1.08    | 8 + 1.15     | 3.25 + 1.11 |
| 9.25 + 3.71  | 12.75 + 7.16  | 12.5 + 3.28  | 5.33 + 1.33   | 8 + 2.86     | 11.5 + 4.33 | 8 + 2.04     | 4.67 + 1.2  |
| 4.67 + 0.33  | 9.25 + 5.12   | 4.33 + 1.76  | 3.25 + 1.6    | 1.25 + 0.63  | 2 + 0.58    | 2.25 + 0.48  | 0.75 + 0.48 |
| 4.67 + 4.18  | 11.75 + 6.02  | 6.67 + 3.18  | 1.75 + 0.85   | 2.5 + 1.32   | 1.5 + 1.19  | 1.25 + 0.95  | 1 + 0       |
| 3.67 + 1.67  | 4.5 + 2.5     | 4 + 1.87     | 3.67 + 0.67   | 3.75 + 0.85  | 0.75 + 0.48 | 0.25 + 0.25  | 0.5 + 0.29  |
| 0.75 + 0.75  | 3.5 + 1.19    | 11.33 + 5.36 | 8.25 + 3.22   | 3 + 1        | 2.5 + 1.19  | 0.5 + 0.29   | 0.5 + 0.29  |
| 5 + 1.87     | 7.5 + 3.3     | 10 + 5.9     | 3.75 + 1.25   | 2.75 + 1.25  | 4.5 + 1.66  | 3.25 + 2.29  | 0.5 + 0.29  |
| 6 + 2.42     | 13.25 + 6.76  | 15 + 7.52    | 6.25 + 2.14   | 5.75 + 0.75  | 4 + 1.08    | 1.25 + 0.63  | 0.75 + 0.48 |
| 0.5 + 0.29   | 3.5 + 1.71    | 3 + 2        | 1 + 0.41      | 0.5 + 0.29   | 1 + 0.58    | 0            | 0           |
| 12.75 + 5.57 | 27.5 + 17.56  | 7.75 + 2.66  | 19.33 + 10.53 | 8.25 + 2.66  | 11.5 + 3.66 | 2.25 + 0.75  | 2.5 + 1.04  |
| 7.25 + 3.01  | 13.5 + 4.79   | 16.75 + 6.1  | 11 + 3.39     | 6.75 + 2.95  | 12.5 + 7.01 | 3.5 + 3.18   | 2 + 1.08    |
| 13.75 + 4.87 | 17.75 + 4.23  | 33.5 + 6.01  | 8.5 + 4.5     | 22.75 + 4.61 | 11 + 3.08   | 17.25 + 2.39 | 4.5 + 2.84  |
| 6 + 1.35     | 6.33 + 2.19   | 12.33 + 1.67 | 4 + 1         | 8.5 + 3.38   | 3.33 + 0.88 | 7 + 1.22     | 3.67 + 2.19 |
| 5.75 + 1.75  | 5.5 + 0.96    | 3.5 + 1.44   | 3 + 0.41      | 3 + 1.08     | 1.75 + 0.75 | 3.75 + 2.25  | 0.25 + 0.25 |
| 1.67 + 0.67  | 1.75 + 0.48   | 4.5 + 1.19   | 3 + 3         | 4 + 1.47     | 2.25 + 0.48 | 2 + 1.35     | 0           |
| 3 + 1        | 5 + 0.58      | 3.75 + 1.49  | 5 + 2.65      | 4 + 1.22     | 3.25 + 0.95 | 1 + 0.58     | 0           |
| 5 + 1.35     | 6.25 + 1.75   | 5.75 + 0.85  | 5.33 + 0.67   | 2.25 + 0.63  | 3.25 + 1.31 | 1.25 + 0.63  | 0           |
| 3.67 + 0.88  | 4.75 + 0.48   | 6.25 + 0.85  | 8 + 1.78      | 4.75 + 0.25  | 4.33 + 0.33 | 1.25 + 0.48  | 0           |

percentage of areas covered by “vegetation” vs “artificial surfaces”) at a 300 m and 3 km radius areas. NA=not available.
