# Supplementary material for: Spatial and Temporal Hot Spots of Aedes albopictus Abundance inside and outside a South European Metropolitan Area
Source: PubMed Central journal article supplement (PMC4917172; doi:10.1371/journal.pntd.0004758), 2016-06-22

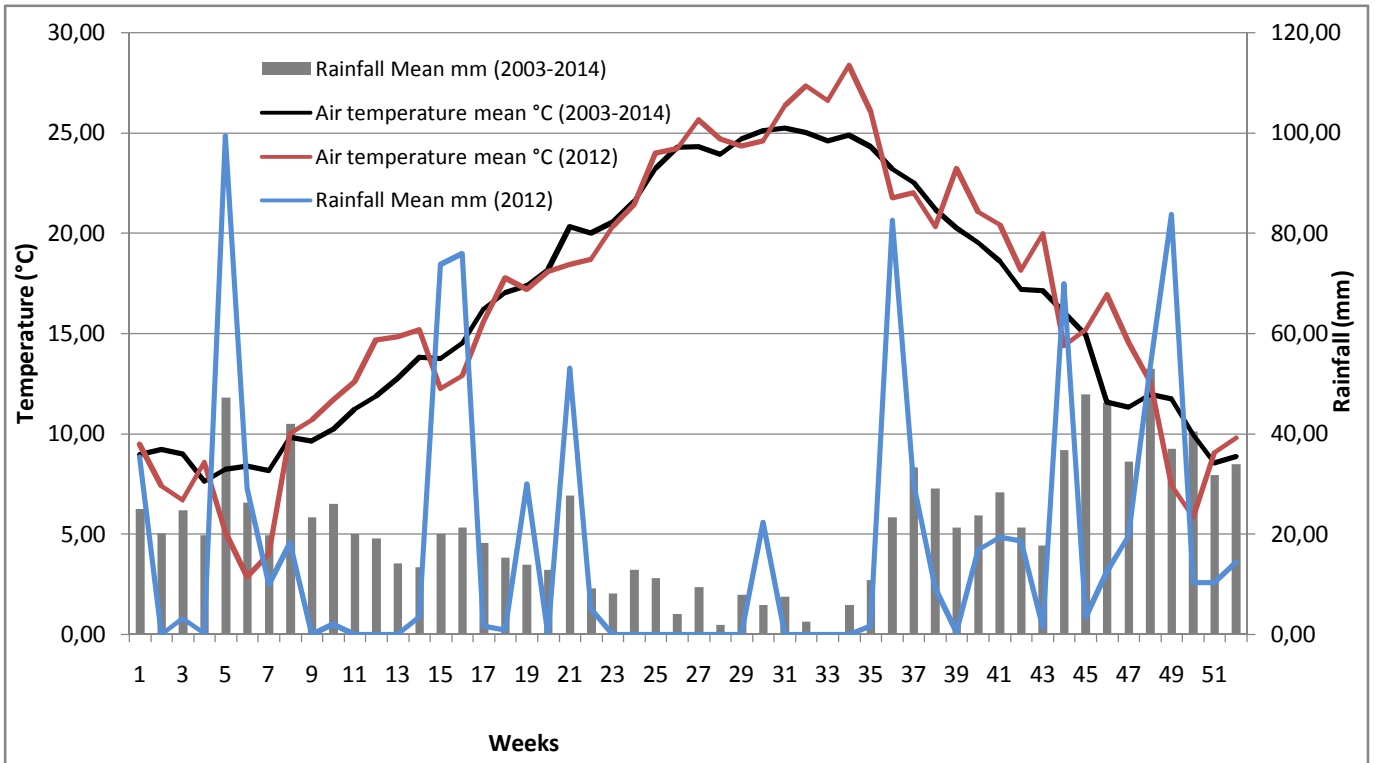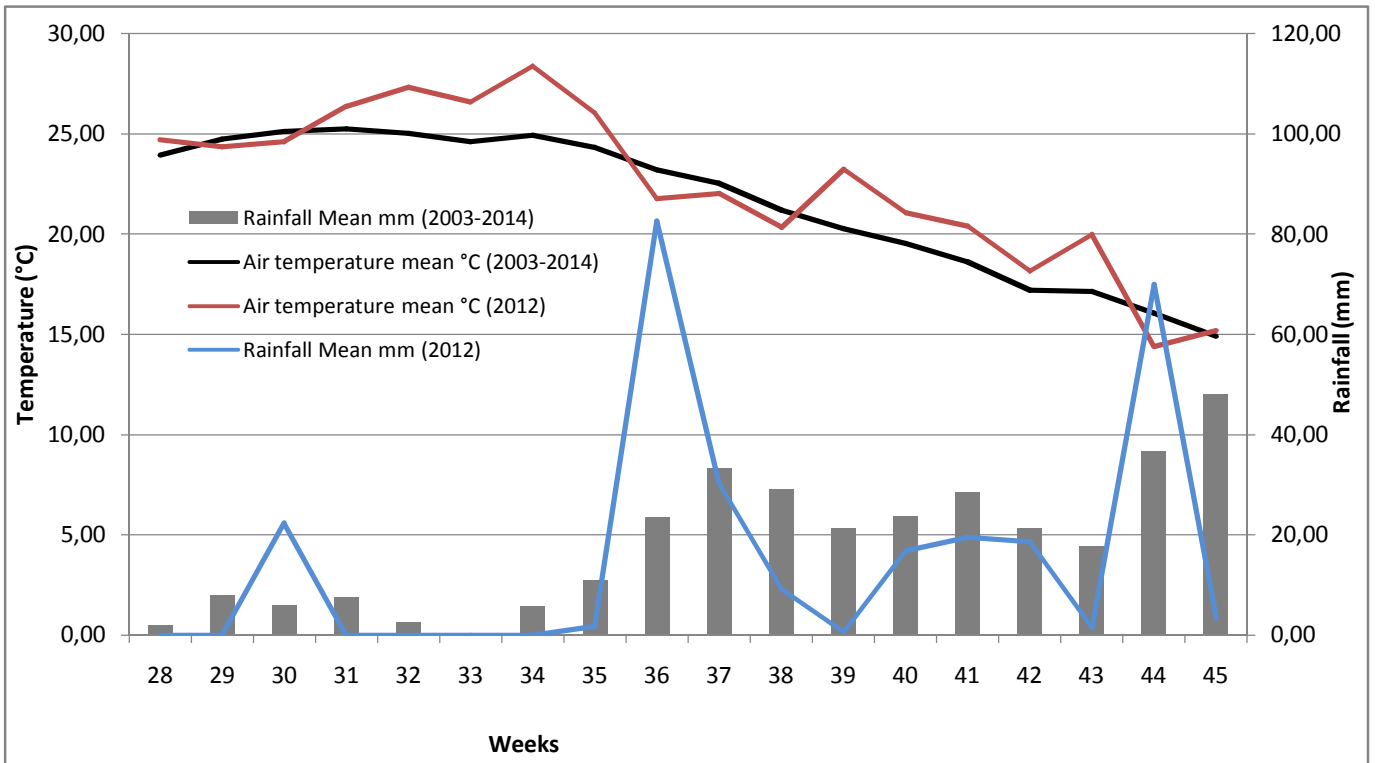

Supplement: pntd.0004758.s004.pdf [file pntd.0004758.s004.pdf]
